# Supplementary material for: Interfacial nanoarchitectonics for ZIF-8 membranes with enhanced gas separation
Source: publisher site journal article supplement (doi:10.3762/bjnano.13.26), 2022-03-22
Supplement: Additional file 1 [file 2190-4286-13-26-S1.pdf]

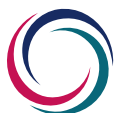

## Supporting Information

for

### Interfacial nanoarchitectonics for ZIF-8 membranes with enhanced gas separation

Season S. Chen, Zhen-Jie Yang, Chia-Hao Chang, Hoong-Uei Koh, Sameerah I. Al-Saeedi, Kuo-Lun Tung and Kevin C.-W. Wu

*Beilstein J. Nanotechnol.* **2022**, *13*, 313–324. [doi:10.3762/bjnano.13.26](https://doi.org/10.3762/bjnano.13.26)

## Additional figures

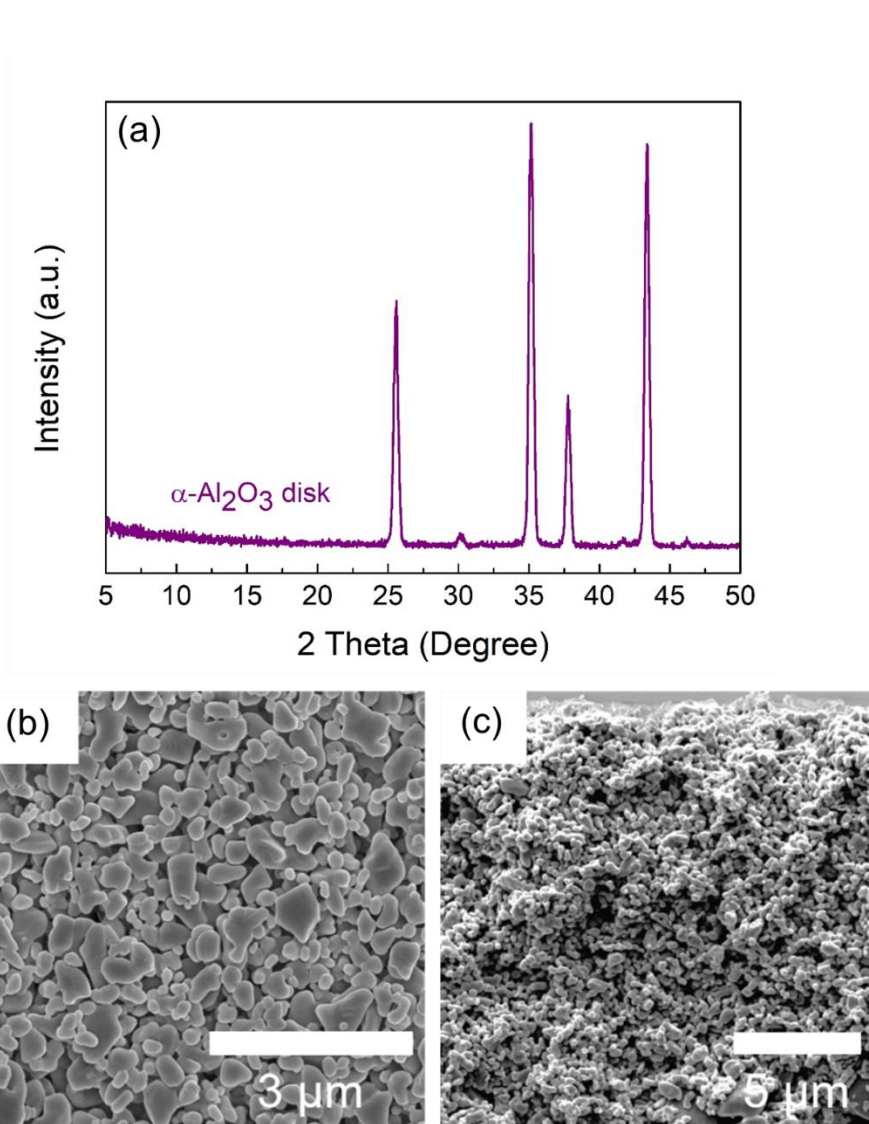

**Figure S1:** The (a) XRD pattern, (b) top view FE-SEM image, and (c) cross-sectional view FE-SEM image of porous  $\alpha$ -Al<sub>2</sub>O<sub>3</sub> disk.

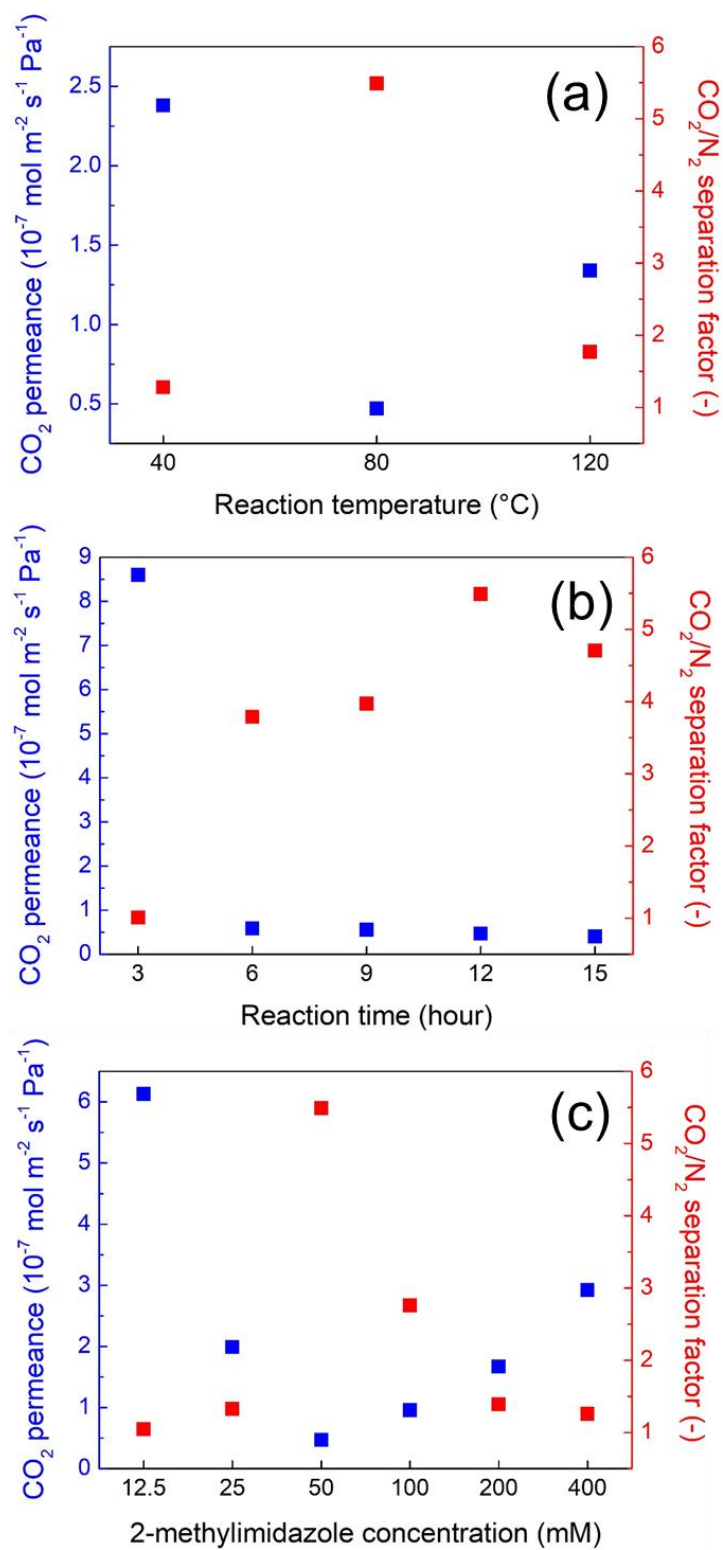

**Figure S2:** Gas separation (CO<sub>2</sub>/N<sub>2</sub>) performance of ZIF-8 membranes fabricated at various (a) temperatures, (b) times, and (c) 2-methylimidazole concentrations.
